# Supplementary material for: The Resistance Levels and Target-Site Based Resistance Mechanisms to Glyphosate in Eleusine indica from China
Source: MDPI journal article supplement (doi:10.3390/agronomy12112780), 2022-11-09
Supplement: s1 [file s1]

**Table S1.** The geographical origins of *E. indica* populations collected from apple orchards around Bohai Rim (Beijing, BJ; Hebei, HB; Liaoning, LN; Shandong, SD) and Loess Plateau (Henan, HN; Shanxi, SX; Shaanxi, SHX), farmland around Dongting (DT) and Poyang (PY) lakes in China.

| Region        | Population | Location                         | Co-ordinate                 |
|---------------|------------|----------------------------------|-----------------------------|
| Bohai Rim     | BJ01       | Haidian district, Beijing        | 116°15'29.1"E; 40°01'49.8"N |
|               | BJ02       | Haidian district, Beijing        | 116°17'50.2"E; 40°01'56.9"N |
|               | BJ04       | Haidian district, Beijing        | 116°18'02.5"E; 40°01'32.3"N |
|               | BJ05       | Haidian district, Beijing        | 116°18'15.8"E; 40°01'26.4"N |
|               | BJ06       | Xicheng district, Beijing        | 116°22'42.2"E; 39°58'02.0"N |
|               | HB01       | Tangshan city, Hebei Province    | 119°04'41.0"E; 39°21'10.8"N |
|               | HB02       | Tangshan city, Hebei Province    | 119°01'55.0"E; 39°20'52.1"N |
|               | HB03       | Qinhuangdao city, Hebei Province | 119°11'57.2"E; 39°44'12.1"N |
|               | HB04       | Qinhuangdao city, Hebei Province | 119°34'31.5"E; 39°56'27.1"N |
|               | HB05       | Qinhuangdao city, Hebei Province | 119°33'05.9"E; 39°57'10.3"N |
|               | HB06       | Qinhuangdao city, Hebei Province | 119°39'26.0"E; 40°01'34.9"N |
|               | HB08       | Qinhuangdao city, Hebei Province | 119°42'22.8"E; 39°59'40.4"N |
|               | LN02       | Huludao city, Liaoning Province  | 120°01'52.4"E; 40°23'26.3"N |
|               | LN04       | Huludao city, Liaoning Province  | 120°44'03.4"E; 40°36'53.9"N |
|               | LN05       | Jingzhou city, Liaoning Province | 121°05'58.7"E; 41°02'18.8"N |
|               | LN06       | Yingkou city, Liaoning Province  | 122°22'47.2"E; 40°21'10.6"N |
|               | LN07       | Yingkou city, Liaoning Province  | 122°13'40.2"E; 40°18'17.7"N |
|               | SD04       | Weifang city, Shandong Province  | 119°30'33.3"E; 36°18'33.1"N |
|               | SD05       | Weifang city, Shandong Province  | 119°30'47.9"E; 36°19'17.9"N |
|               | SD07       | Qingdao city, Shandong Province  | 120°17'05.3"E; 36°52'28.8"N |
|               | SD08       | Qingdao city, Shandong Province  | 120°17'27.0"E; 36°53'05.9"N |
|               | SD09       | Yantai city, Shandong Province   | 121°02'27.7"E; 37°28'45.3"N |
|               | SD10       | Yantai city, Shandong Province   | 120°58'23.8"E; 37°27'53.4"N |
|               | SD12       | Yantai city, Shandong Province   | 120°52'56.0"E; 37°25'18.0"N |
|               | SD14       | Qingdao city, Shandong Province  | 119°53'05.6"E; 35°57'41.2"N |
|               | SD15       | Qingdao city, Shandong Province  | 119°51'12.1"E; 35°54'42.1"N |
| Loess Plateau | SX01       | Linfen city, Shanxi Province     | 111°17'41.5"E; 35°49'18.4"N |
|               | SX03       | Linfen city, Shanxi Province     | 111°14'27.3"E; 35°48'03.3"N |
|               | SX05       | Yuncheng city, Shanxi Province   | 110°49'21.8"E; 35°06'55.0"N |
|               | SX07       | Yuncheng city, Shanxi Province   | 110°45'42.4"E; 35°13'38.7"N |
|               | HN01       | Sanmenxia city, Henan Province   | 111°13'16.6"E; 34°37'22.9"N |
|               | HN03       | Lingbao city, Henan Province     | 110°57'12.4"E; 34°34'23.1"N |
|               | SHX01      | Xianyang city, Shaanxi Province  | 108°24'06.3"E; 34°28'17.0"N |
|               | SHX04      | Yanan city, Shaanxi Province     | 109°29'02.5"E; 35°49'28.0"N |
| Dongting lake | DT01       | Yueyang city, Hunan Province     | 112°34'26.2"E; 29°29'01.7"N |
|               | DT03       | Yueyang city, Hunan Province     | 112°25'25.5"E; 29°23'34.6"N |
|               | DT06       | Changde city, Hunan Province     | 112°07'21.4"E; 29°22'16.4"N |
|               | DT07       | Changde city, Hunan Province     | 112°04'37.7"E; 29°17'45.9"N |

|             |      |                                 |                             |
|-------------|------|---------------------------------|-----------------------------|
| Poyang lake | DT09 | Changde city, Hunan Province    | 111°49'08.9"E; 29°39'04.9"N |
|             | DT11 | Changde city, Hunan Province    | 111°45'44.5"E; 29°47'15.8"N |
|             | DT12 | Changde city, Hunan Province    | 111°58'48.3"E; 29°01'57.5"N |
|             | DT13 | Changde city, Hunan Province    | 112°01'16.3"E; 29°01'12.9"N |
|             | PY02 | Jiujiang city, Jiangxi Province | 115°42'12.0"E; 29°11'21.1"N |
|             | PY03 | Jiujiang city, Jiangxi Province | 115°57'36.9"E; 29°26'47.1"N |
|             | PY04 | Jiujiang city, Jiangxi Province | 115°59'56.0"E; 29°23'29.6"N |
|             | PY05 | Jiujiang city, Jiangxi Province | 115°56'30.0"E; 29°23'03.4"N |
|             | PY08 | Jiujiang city, Jiangxi Province | 116°22'58.8"E; 29°45'35.4"N |
|             | PY06 | Jiujiang city, Jiangxi Province | 115°52'29.3"E; 29°30'38.8"N |
|             | PY07 | Jiujiang city, Jiangxi Province | 115°55'52.0"E; 29°35'15.4"N |
|             | PY10 | Jiujiang city, Jiangxi Province | 116°30'25.6"E; 29°52'05.0"N |

**Table S2.** The GR<sub>50</sub> values estimated by dose-response curves of *E. indica* populations collected from apple orchards around Bohai Rim (Beijing, BJ; Hebei, HB; Liaoning, LN; Shandong, SD) and Loess Plateau (Henan, HN; Shanxi, SX; Shannxi, SHX), farmland around Dongting (DT) and Poyang (PY) lakes in China.

| Population | GR <sub>50</sub> ±SD (mg/L) | RI   | Population | GR <sub>50</sub> ±SD (mg/L) | RI    |
|------------|-----------------------------|------|------------|-----------------------------|-------|
| BJ05       | 8.95±4.85                   | 1.00 | BJ06       | 27.59±11.77                 | 3.08  |
| HB06       | 7.89±2.81                   | 0.88 | DT12       | 28.78±13.09                 | 3.22  |
| SD04       | 7.87±1.32                   | 0.88 | SD09       | 29.32±6.70                  | 3.28  |
| SX01       | 8.87±9.13                   | 0.99 | PY08       | 29.84±7.42                  | 3.33  |
| BJ04       | 9.90±6.90                   | 1.11 | HB05       | 33.23±2.74                  | 3.71  |
| PY07       | 9.85±3.49                   | 1.10 | SD10       | 35.60±4.86                  | 3.98  |
| HB02       | 11.63±4.28                  | 1.30 | LN06       | 37.03±7.50                  | 4.14  |
| SX07       | 12.53±4.60                  | 1.40 | SX05       | 37.03±7.50                  | 4.14  |
| BJ01       | 13.55±4.37                  | 1.51 | DT09       | 37.76±16.29                 | 4.22  |
| HB04       | 13.78±8.73                  | 1.54 | LN07       | 38.19±11.93                 | 4.27  |
| BJ02       | 13.93±6.88                  | 1.56 | SD05       | 40.81±4.61                  | 4.56  |
| HB01       | 14.23±4.99                  | 1.59 | SD15       | 42.04±5.00                  | 4.70  |
| SD14       | 14.87±7.63                  | 1.66 | LN04       | 43.43±17.69                 | 4.85  |
| DT03       | 17.46±13.64                 | 1.95 | SHX01      | 46.61±5.14                  | 5.21  |
| PY03       | 17.42±9.76                  | 1.95 | PY10       | 46.77±23.74                 | 5.23  |
| HN03       | 17.96±4.40                  | 2.01 | HB08       | 47.47±6.49                  | 5.31  |
| HN01       | 18.76±6.74                  | 2.10 | SD12       | 48.34±5.54                  | 5.40  |
| LN02       | 18.98±7.76                  | 2.12 | LN05       | 48.50±4.84                  | 5.42  |
| SD07       | 19.84±7.08                  | 2.22 | PY02       | 50.70±15.11                 | 5.67  |
| PY05       | 19.91±7.84                  | 2.22 | DT13       | 53.36±8.19                  | 5.96  |
| DT07       | 21.14±6.87                  | 2.36 | HB03       | 53.36±6.96                  | 5.96  |
| DT11       | 21.35±6.32                  | 2.39 | PY04       | 56.33±8.76                  | 6.30  |
| SHX04      | 22.49±3.52                  | 2.51 | PY06       | 57.41±11.08                 | 6.42  |
| DT01       | 26.44±10.19                 | 2.96 | DT06       | 88.16±11.35                 | 9.85  |
| SD08       | 26.56±8.44                  | 2.97 | SX03       | 93.28±5.40                  | 10.43 |
